# $\bar{O}vSim$ : a Simulation of the Population Dynamics of Mammalian Ovarian Follicles

Joshua Johnson<sup>1\*</sup>, Xin Chen<sup>1,2</sup>, Xiao Xu<sup>1</sup>, John W. Emerson<sup>3</sup>

**1 Yale School of Medicine, Department of Obstetrics, Gynecology, & Reproductive Sciences, 333 Cedar Street, Tompkins 2-203, New Haven, CT, 06520-8063, USA**

**2 Center of Reproductive Medicine, Department of Gynecology and Obstetrics, Nanfang Hospital, Southern Medical University, Guangzhou 510515, China**

**3 Department of Statistics, Yale University, 24 Hillhouse Avenue, Room B06, New Haven, CT, 06520, USA**

\* [josh.johnson@yale.edu](mailto:josh.johnson@yale.edu)

## Abstract

No two ovaries are alike, and indeed, the same ovary can change its architecture from day to day. This is because ovarian follicles are present in different numbers, positions, and states of maturation throughout reproductive life. All possible developmental states of follicles can be represented at any time, along with follicles that have committed to death (termed follicle atresia). Static histological and whole-mount imaging approaches allow snapshots of what is occurring within ovaries, but our views of dynamic follicle growth and death have been limited to these tools. We present a simple Markov chain model of the complex mouse ovary, called “ $\bar{O}vSim$ ”. In the model, follicles can exist in one of three Markov states with stationary probabilities, Hold (growth arrest), Grow, and Die. The probability that individual primordial follicles can growth activate daily, the fraction of granulosa cells that survive as follicles grow, and the probability that individual follicles can commit to atresia daily are user definable parameters. When the

probability of daily growth activation is near 0.005, the probability of atresia for all follicles is near 0.1, and the probability of granulosa cell survival is modeled around 0.88,  $\bar{O}vSim$  simulates the growth and fate of each of the approximately 3000 postpubertal mouse ovarian follicles in a fashion that closely matches biological measurements.  $\bar{O}vSim$  thus offers a starting platform to simulate mammalian ovaries and to explore factors that might impact follicle development and global organ function.

## Author Summary

$\bar{O}vSim$  is a computer simulation of the dynamic growth of mouse ovarian follicles. The program is offered as the beginning of a research and teaching platform to model asynchronous follicle growth and survival or death.

## Introduction

A central goal in reproductive biology and medicine is determining mechanisms that control the fates of mammalian ovarian follicles. This is because follicle growth and survival control the availability of the mature eggs used for conception. Follicles also produce endocrine hormones that are key not only for reproduction, but that support health and quality of life. An ovarian follicle consists of a single oocyte and associated somatic cells. After a period of growth arrest in a ‘primordial’ follicle state, growth activation can occur *via* upregulation of mTOR/Akt signaling [1–5]. Somatic granulosa cells begin to proliferate around the oocyte, which itself grows in size and later resumes and completes meiosis [6, 7]. Few follicles survive to the final ovulatory stage where they can release a mature egg; the majority of follicles die within the ovary in a process called atresia [8–10]. Because follicles are present in the thousands in reproductive-age mice and humans, and their growth, development and death occur in an asynchronous, stochastic fashion, it can be difficult to conceptualize the ovary’s function(s) as an endocrine organ and how it achieves its consistent production of mature eggs.

The most common approaches used to account for the developmental states and survival (or death) of follicles is the preparation of static histological sections. These are referred to as histomorphometric approaches [8, 11, 12]. Histological sections allow a

very detailed micron-scale appreciation for all of the cell types and structures in and around follicles. More recently, whole-mount fluorescence analysis has been used to great effect, providing a finely-grained accounting of the numbers and sizes of follicle-enclosed oocytes [13, 14]. Future modifications of this latter approach may eventually allow for computer-assisted analysis of the disposition of the somatic cells of follicles as well. Experience with the laborious process of histomorphometric follicle counting and analysis led us to question whether an *in silico* approach of simulation and analysis was possible.

Tools for the simulation and visualization of dynamic follicle development within the mammalian ovary have not been available. We hypothesized that establishing a simple set of rules for i) follicle growth activation, ii) granulosa cell proliferation, iii) granulosa cell death, and iv) individual follicle survival could provide the necessary starting points for a rudimentary simulation of stochastic follicle behavior over time. Consideration of these rules led us to a Markov chain approach

We reasoned that follicles can exist as growth arrested primordial follicles (a “Hold” state), growing follicles (a “Grow” state), and follicles that have committed to die *via* atresia (a “Die” state). Markov state transition models have been applied as powerful tools in the health and medical literature (e.g., in disease models) [15–19], and initial modeling of follicles in this way proved fruitful.

We have now produced a function in the R language [20],  $\bar{O}vSim$ , to model follicle Markov state transitions across a discrete time series.  $\bar{O}vSim$  simulates follicle development and population dynamics according to user-specified starting population of follicles and transition probabilities. To our surprise, the simple probability model, with informally selected and reasonable parameter values, can produce remarkably accurate representations of follicle population dynamics, closely matching the biologically observed number of surviving follicles (and thus an estimate of ovulated eggs) over time. Although this does not prove that the apparently complex process of follicle population dynamics is simple, the results show that a relatively simple probability-dependent process is consistent with and could help us better understand the process of follicle development in nature.

## Materials and Methods

### Markov chain modeling

The term Markov chain, named after Russian mathematician Andrey Markov (1856-1922), refers to a method for representing stochastic processes by dividing them into unique “states” in a chain. To be modeled by a Markov chain, the states must be considered to behave independently of any past behavior—a characteristic called “memorylessness.” The probability of moving on to any subsequent state thus only depends on the present state. To model ovarian follicle development using a Markov approach, we establish three states of follicle development (growth arrest, growth, and death; Figure 1) as meeting this criterion. Individual follicles begin in the growth arrest state, and the state can either change or stay the same according to random transition probabilities at each step moving forward in time (in the simulation, days).

### Model structure

A simplified example of the Markov matrix operations that we use to simulate follicle growth is seen as follows in (1), where three growth-arrested follicles,  $A$ ,  $B$ , and  $C$  are represented by vertical matrix entries populated by one, two, and one “granulosa cell(s).”

$$\begin{array}{c}
 \begin{array}{ccc}
 & A & B & C \\
 \text{Start} = & 1 & \mathbf{3} & \mathbf{1}
 \end{array}
 & \rightarrow &
 \begin{array}{ccc}
 & A & B & C \\
 \text{Step1} = & 1 & \mathbf{3} & \mathbf{1} \\
 & 1 & \mathbf{6} & \mathbf{2}
 \end{array}
 & \rightarrow &
 \begin{array}{ccc}
 & A & B & C \\
 \text{Step2} = & 1 & \mathbf{3} & \mathbf{1} \\
 & 1 & \mathbf{6} & \mathbf{2} \\
 & & 1 & \mathbf{10^*} & \mathbf{0^{**}}
 \end{array}
 \dots
 \end{array}
 \tag{1}$$

When the simulation begins, follicle states are calculated at each model step according to transition probabilities. In *Step1*, one example follicle ( $A$ ) remains growth-arrested (e.g., its probability calculation results in the “Hold” state) and it maintains its number of pregranulosa cells. The other two follicles ( $B$  and  $C$ , indicated by bold, underlined

numbers) growth activate in *Step1* (their probability calculations result in a state change from “Hold” to “Grow”). Existence within the “Grow” state means that follicles can either continue to grow (and granulosa cell number approximately doubles each step) or transition to the “Die” state. In *Step2*, follicle *B* grows but is shown to contain less than double the number of granulosa cells in the previous step due to granulosa cell death (\*, according to a Bernoulli random variable, details in  $\bar{O}vSim$  R code, below). Follicle *C* grew in *Step1*, but commits to atresia in *Step2* because its probability calculation resulted in the “Die” state, and its granulosa cell number is set to zero (\*\*, see details in  $\bar{O}vSim$  R code, below). These steps are represented in the Markov state transition diagram in Figure 1.

## $\bar{O}vSim$ R code and model parameters

$\bar{O}vSim$  R code and accompanying documentation is available on GitHub (<https://github.com/johnsonlab/OvSim>) and has been released using the MIT License (<http://opensource.org/licenses/MIT>; see Supporting Information).  $\bar{O}vSim$  was designed using known biological parameters of ovarian follicles while allowing users to modify some of these parameters (Table 1). Once the script is activated, a numerical matrix is populated with randomly-generated values corresponding to the starting number of granulosa cells in individual simulated primordial follicles (e.g., one, two, or three pregranulosa cells per [21]; see also “puberty” option below).

In  $\bar{O}vSim$ , the starting number of follicles in the ovary (*NF*), the number of days of time (*ND*) to run the simulation, and the length of the ovulatory cycle (*cyclength*) can all be specified. We set the number of mouse ovarian follicles to 3000, including 2250 primordial follicles (after [11] and [22]) for most of our studies. Ovulatory cycle length for mice was set at 4, 4.5, or 5 days. The script then continues to loop with “daily” probability calculations and operations upon each follicle entry in the matrix. Simulations run for 420 days by default (14 months), corresponding approximately the fertile lifespan of C57Bl/6 mice fed *ad libitum* [23].

Parameters related to follicle growth can be specified as follows. *phold* is the stationary probability that a primordial follicle stays growth arrested each day. Individual primordial follicles either stay arrested and therefore maintain their cell

number of 1, 2, or 3, or, growth activate. Growth activation releases that follicle represented in the matrix to a state of exponential granulosa cell growth with a daily doubling time. Granulosa cell number is then controlled by the probability that individual cells within a growing follicle survive (*pcelllive*). Our estimates using histological sections detect a background of pyknotic granulosa cells between 15 and 20% within follicles thought to be intact. Thus (*pcelllive*) is modeled as independent Bernoulli random variable within that range with 0.8 as the default value.

To control the fraction of follicles that commit to atresia, a conditional stationary probability, *cond.pdub* is executed upon each matrix entry each day. As mentioned, the follicle's matrix entry can double (minus the cell death induced by *pcelllive*, above) with probability *cond.pdub*, Alternatively, the follicle can “die” via atresia with the probability  $1 - \textit{cond.pdub}$ . A follicle's death is simulated by its matrix entry being set to zero.

The parameter *ejectnum* (50,000 by default) reflects the number of granulosa cells required for a follicle to be categorized as a fully mature preovulatory follicle. Critically, the simulation as designed here does not control the final stage(s) of follicle development that ensure that ovulation occurs on only one day per cycle. For now, we are modeling growth patterns that can give rise to approximately ovulatory sized follicles within an entire single ovulatory cycle (4 - 5 days in the mouse). Using [6] as a guide, we set the threshold for survival to ovulation to 50,000 but experimented with thresholds as large as 500,000 granulosa cells.

We also added the ability to optionally begin the simulation placing the ovary in a peripubertal state, where several hundred follicles have already reached the preantral stage of growth awaiting puberty. The option “puberty,” when set to TRUE, populates a user-specified number of matrix entries (variable IGP for initial growing pool) with granulosa cell numbers that range from newly growth-activated to the estimated number of granulosa cells in peripubertal preantral follicles. The number of growing follicles and the range of granulosa cells in this prepubertal growing pool can also be user defined. Overall, it can be said that the model parameters were not formally estimated, but were instead selected based on our domain expertise. The question was whether a simple model of follicle population dynamics might recapitulate apparently complex patterns of follicle growth and survival seen *in vivo*.

## Mice and tissue collection

C57BL/6 mice were handled and tissues were collected in accordance with an active protocol under the auspices of the Yale IACUC. Fresh ovaries were removed and cleaned from the fat, rinsed in PBS and fixed in Dietrich's fixative (30% Ethanol (EtOH; v/v), 10% Formalin (v/v - using aqueous 37% Formaldehyde solution), 2% Glacial Acetic Acid (v/v); filter prior to use) overnight. Ovaries were then transferred into 70% EtOH for storage at 4°C. Specimens were batched and embedded in paraffin. 5  $\mu$ m serial sections were cut and placed onto glass slides (Fisher Superfrost/Plus Microscope slides-Pre-cleaned (#12-550-15). Slides were warmed, dewaxed with Xylenes (3 times x 5 min.) and rehydrated through an increasing alcohol series up to distilled water and then PBS. Slides were then stained in Weigert's Iron Hematoxylin for 10 min. followed by counterstaining in Methyl Blue (0.4 mg/ml in saturated aqueous Picric Acid) for 6 min. Finally, specimens were dehydrated and coverslipped in mounting media (Richard-Allan Scientific Cytoseal-60 Low Viscosity (# 8310-16).

## Histomorphometric follicle counting of primordial follicles

Primordial follicles were counted in every fifth serial section, with raw numbers multiplied by 5 as previously described [24,25]. A follicle was considered primordial if a single layer of flattened pre-granulosa cells surrounded the oocyte.

## Results

### Using $\bar{O}vSim$ to Simulate the Mouse Ovary

To model the development of mouse ovarian follicles over a normal reproductive lifespan, the parameters in the *follicle* function are initialized with “default” values shown in the following function declaration:

```
ovsim <- function(NF = 3000,  
                 ND = 420,  
                 IGP = 300,  
                 phold = 0.995,  
                 cond.pdub = 0.9,  
                 pcelllive = 0.8,  
                 cyclength = 4,  
                 ejectnum = 50000,  
                 puberty = TRUE,  
                 verbose = TRUE,  
                 pdfname = NA)
```

Here, 3000 total follicles are present at the start, 2700 of which are primordial (1-3 granulosa cells), and 300 are small growing follicles randomly modeled to have initiated growth in a prepubertal cohort. The estrus cycle length is 4 days, and follicle survival to ovulatory size is “called” if granulosa cell number reaches 50,000. A Markov chain state transition matrix for the stationary probabilities of our three states (Hold, Grow, and Die) according to these settings is shown as follows in (2):

$$P = \begin{matrix} & \begin{matrix} Hold \\ Grow \\ Die \end{matrix} & \begin{bmatrix} 0.995 & 0.005 & 0 \\ 0 & 0.9 & 0.1 \\ 0 & 0 & 1 \end{bmatrix} \end{matrix} \quad (2)$$

The arrows in Figure 1 are labeled with the stationary probabilities in this matrix, reflecting these user settings. Note that matrix entries that exceed 50,000 simulated granulosa cells are categorized as having survived to ovulatory size, and that follicles that have committed to atresia must stay dead, and therefore their probability of remaining in that state is 1. Representative plots of  $\bar{O}vSim$  output when an approximately 6-week-old mouse ovary is simulated using these default settings are shown in Figure 2. The output includes a number of key biological ovarian outcomes, listed as follows along with an example output for a single run: the number of total



atretic follicles (2280) along with the corresponding percentage of follicles that die over the run, (65.14%), the total number of eggs that ovulated (380), and the total number of intact follicles that remained at the end of the run (primordial or growing; 340). In this single run, a maximum of 22 ovulatory size follicles were available in the fourth estrus cycle (18 days after simulation start). An average of 4.1 and a median of 3 ovulatory size follicles were produced per estrus cycle over the entire simulated mouse reproductive lifespan.

Panel 2A shows the trend of decline of the primordial pool over time after execution of the simulation 1000 times. The plot depicts the 1st and 99th percentiles of simulation data (A, gray hatched area). Individual data points for actual counts of C57Bl/6 mouse follicles in histological sections at 6 weeks, 8 months, and 12 months are overlaid with simulated data (circles). Panel 2B is a plot of the growth and death of individual follicles that die within the 420 days of simulated time. Granulosa cell number is represented by the dashed lines, and the time (and follicle “size”) of death is indicated by the letter “D.” Last, Panel 2C is a histogram plot of the distribution of follicles that survive to ovulatory size, grouped in 4 day increments equivalent to the modeled estrus (e.g., ovulatory) cycle length. The number of eggs available for ovulation each cycle are therefore depicted.  $\bar{O}vSim$  also provides CSV-formatted data associated with these plots, useful for finer analyses of ovulatory follicle number.

## Application of $\bar{O}vSim$ to human follicle dynamics

Simulation parameters can also be set to conditions mimicking the human ovary, ovulatory cycle length, and approximate reproductive lifespan. For a preliminary human simulation, we set an appropriate number of human primordial follicles at (50,000), the menstrual cycle length to 30 days, and simulated 35 years (unique variable Y, representing the span from approximate ages 15 to 50) of reproductive life. We specified that approximately 1 in 10,000 primordial follicles growth activated per day (phold=0.9999) but kept the follicle survival rate (cond.pdub) and the probability that individual granulosa cells (pcelllive) survive the same as in the mouse simulations (0.88 and 0.75, respectively). For the larger human periovulatory follicle, we set the number of granulosa cells at 500,000. A summary of these parameters as entered follows here.

```
human <- function(NF = 50000,  
                 Y = 35,  
                 ND = 365*Y,  
                 IGP = 0,  
                 phold = 0.9999,  
                 cond.pdub = 0.88,  
                 pcelllive = 0.75,  
                 ejectnum = 500000,  
                 cyclength = 30,  
                 puberty = FALSE,  
                 verbose = TRUE,  
                 pdfname = NA)
```

Representative output from these settings showed follicles that die or survive to ovulatory size in numbers that were reminiscent of human biological outcomes. The total number of follicles that survived to periovulatory size (contain 500,000 granulosa cells) was 605, and the total number of atretic follicles over time was 35403. This meant that 1.4 simulated follicles survived to periovulatory size per month over the length of the simulation. Lacking any additional complexity beyond these parameters, the Markov approach here came very close to the expected “one egg per cycle” output seen in most human natural ovulatory cycles.

## Discussion

The  $\bar{O}vSim$  R function simulates ovarian follicle growth using user-definable parameters; when set appropriately, simulations produce results that closely match numbers seen over reproductive life *in vivo*. Follicles that growth activate, die, and reach ovulatory size match the numbers seen *in vivo* over time.

We emphasize that this is a complete but early-stage simulation using stationary probabilities that does not take into account known features of biological follicle development. For example, in the mouse and human ovary, paracrine signaling interactions between follicles impact follicle growth activation [26] and perhaps follicle survival [27,28]. Anti-Müllerian hormone (AMH) produced by growing follicles has been

shown to inhibit the growth-activation of primordial follicles [26, 29, 30]. AMH action could be simulated in  $\bar{O}vSim$ , by modeling growth activation (“Hold” variable) as a non-stationary probability where “Hold” would decrease over time. In that case, follicle growth activation would accelerate as the number of growing follicles depleted, and it is likely that the curve of simulated primordial follicle number in Figure 2A would more precisely match the histomorphometric follicle numbers counted at 1 year of age. We will work to include finer details of follicle biology in this simulation, including the effects of modeled paracrine and endocrine signaling. What is clear, however is that stationary probabilities for growth activation and death in our simple model can result in biologically-relevant numbers of follicles that survive to the ovulatory stage or die. It is important to consider how synchronization occurs *in vivo* such that those follicles that survive to reach ovulatory size ovulate together on a single day.

The problem of synchronous follicle *availability* for ovulation can be solved by simple rules, but not the more precise follicle *synchronization* such that all periovulatory follicles ovulate on a single day. Selection for ovulation is solved by an additional layer of complexity, the hormonal ovulatory cycle. Ovulation and the final stages of meiotic maturation occur after the LH surge on a single day of the ovulatory cycle, favoring the production of mature eggs on the day of ovulation as well. The hormonal ovulatory cycle can be considered as a “binning” or “winnowing” mechanism, acting upon and selecting follicles of appropriate size to ensure that an appropriate number are ovulated only one day per cycle. The word winnowing can imply the removal of undesirable elements, as in the potential removal of poorer quality oocytes, but whether selection for high quality eggs does occur *in vivo* is unclear [31–33].

Ensuring that the number of eggs ovulated is tightly regulated in female mammals can be a matter of life or death. Ovulating too few eggs could compromise the survival of a species if too few offspring were produced over time. Ovulating too many eggs can also compromise the survival of a species. Multiple gestation in humans is well known to be a significant risk factor for maternal and offspring loss of life [34–36]. Evolving mechanisms to ensure that the correct number of eggs are produced within an organism’s overall reproductive strategy would therefore have been favored. It is striking that simple regulatory mechanisms (e.g., constant growth activation and atresia rates) can solve much of the problem of the periodic production of ‘safe’ numbers of

eggs. Adding a level of ovulatory cyclicity to a future version of  $\bar{O}vSim$  will allow the control of ovulation timing to be simulated, and may provide clues about the evolution of the ovulatory cycle itself.

$\bar{O}vSim$  trials show that just a few control parameters can give rise to patterns of asynchronous follicle growth that appear complex. In this initial simulation model, the control parameters do not include any simulation of interaction(s) between follicles. Follicle development within mammalian ovaries may thus in some ways fit the criteria for the phenomenon called emergent behavior [37,38]. Emergent behavior or emergent property(ies) can appear when a number of simple entities (here, follicles) operate in an environment and form more complex behaviors as a collective (the ovary). Another definition of emergent behavior is any behavior of a system that is not a property of any of the components of that system [38]. The mouse (and human) ovary can be modeled as a “system of systems” where overall organ behavior can arise from, but is not necessarily a property of, individual follicles.

Knowing that simple rules can control the number of follicles at different stages of development and death in a fashion that mimics ovarian biology opens the question of how close such simulations come to reality. ‘Wet lab’ experiments can be designed to test whether such simple rules underlie ovarian function *in vivo*, and if so, what mechanisms enforce those rules. What mechanisms could control a fixed approximate 1% growth activation rate and 10% overall atresia rate? How could seemingly equivalent primordial follicles growth activate at such a constant rate without activating too quickly or slowly, ensuring that the total duration of ovarian function is appropriate for the reproductive strategy of the female? How can the rate of follicle atresia similarly remain so constant? Premature cessation of ovarian function could result if the rate of either growth activation or atresia were increased (see [39] for a review).  $\bar{O}vSim$  can also be modified to model questions that are even more theoretical, such as the impact of ovotoxic agents (e.g., chemotherapeutic or radiological intervention(s)) upon the duration of ovarian function, or, the impact of the additional of new follicles postnatally as suggested by studies that support postnatal oogenesis.

The current prevailing consensus in the field is that oogenesis and folliculogenesis ceases before or around birth in most mammals. However, since the first paper calling this into question [22], evidence continues to build that postnatal follicle development

can occur *via* the action of female germline stem cells (FGSC) [40–51]. FGSC are currently being used as a source of mitochondria (see [51] for a review) for delivery to oocyte cytoplasm in attempts to improve egg quality and pregnancy rates in the clinic [52, 53]. It is a relatively trivial matter to modify the  $\bar{O}vSim$  *follicles* function so that new follicles are added at a desired rate and the impact upon the trajectory of follicle loss over time can be estimated. We will continue to develop flexible tools like  $\bar{O}vSim$  to address these exciting questions, and hope that other groups will modify the package and build on this approach.

## Supporting Information

### $\bar{O}vSim$ Package Installation

All package and supporting files are available on GitHub (<https://github.com/johnsonlab/OvSim>) and has been released using the MIT License (<http://opensource.org/licenses/MIT>).  $\bar{O}vSim$  can be installed in an R Environment by following the instructions in the file README.md. Alternatively, the single text file `ovsim.R` can be executed within R after optional alteration of individual parameters.

### $\bar{O}vSim$ Package License

$\bar{O}vSim$  is available under the conditions of The MIT License (MIT)

© 2015 Joshua Johnson and John W. Emerson

Permission is hereby granted, free of charge, to any person obtaining a copy of this software and associated documentation files (the "Software"), to deal in the Software without restriction, including without limitation the rights to use, copy, modify, merge, publish, distribute, sublicense, and/or sell copies of the Software, and to permit persons to whom the Software is furnished to do so, subject to the following conditions:

The above copyright notice and this permission notice shall be included in all copies or substantial portions of the Software.

THE SOFTWARE IS PROVIDED "AS IS", WITHOUT WARRANTY OF ANY KIND, EXPRESS OR IMPLIED, INCLUDING BUT NOT LIMITED TO THE

WARRANTIES OF MERCHANTABILITY, FITNESS FOR A PARTICULAR PURPOSE AND NONINFRINGEMENT. IN NO EVENT SHALL THE AUTHORS OR COPYRIGHT HOLDERS BE LIABLE FOR ANY CLAIM, DAMAGES OR OTHER LIABILITY, WHETHER IN AN ACTION OF CONTRACT, TORT OR OTHERWISE, ARISING FROM, OUT OF OR IN CONNECTION WITH THE SOFTWARE OR THE USE OR OTHER DEALINGS IN THE SOFTWARE.

## Acknowledgments

Drs. Giovanni Cottichio and Taiwo Togun are acknowledged for comments upon the manuscript prior to submission.

## Funding

These studies were supported by a Milstein Medical Asian American Partnership Foundation Fellowship Award in Reproductive Medicine (X.C.) and The Albert McKern Fund for Perinatal Research (J.J.).

## References

1. Reddy P, Liu L, Adhikari D, Jagarlamudi K, Rajareddy S, Shen Y, et al. Oocyte-specific deletion of Pten causes premature activation of the primordial follicle pool. *Science*. 2008 Feb;319(5863):611–613.
2. Adhikari D, Gorre N, Risal S, Zhao Z, Zhang H, Shen Y, et al. The safe use of a PTEN inhibitor for the activation of dormant mouse primordial follicles and generation of fertilizable eggs. *PLoS ONE*. 2012;7(6):e39034.
3. McLaughlin M, Kinnell HL, Anderson RA, Telfer EE. Inhibition of phosphatase and tensin homologue (PTEN) in human ovary in vitro results in increased activation of primordial follicles but compromises development of growing follicles. *Mol Hum Reprod*. 2014 Aug;20(8):736–744.

4. Cheng Y, Kim J, Li XX, Hsueh AJ. Promotion of ovarian follicle growth following mTOR activation: synergistic effects of AKT stimulators. *PLoS ONE*. 2015;10(2):e0117769.
5. Hsueh AJ, Kawamura K, Cheng Y, Fauser BC. Intraovarian control of early folliculogenesis. *Endocr Rev*. 2015 Feb;36(1):1–24.
6. Pedersen T, Peters H. Proposal for a classification of oocytes and follicles in the mouse ovary. *J Reprod Fertil*. 1968 Dec;17(3):555–557.
7. Anderson LD, Hirshfield AN. An overview of follicular development in the ovary: from embryo to the fertilized ovum in vitro. *Md Med J*. 1992 Jul;41(7):614–620.
8. Hirshfield AN. Development of follicles in the mammalian ovary. *Int Rev Cytol*. 1991;124:43–101.
9. Tilly JL, Kowalski KI, Johnson AL, Hsueh AJ. Involvement of apoptosis in ovarian follicular atresia and postovulatory regression. *Endocrinology*. 1991 Nov;129:2799–2801.
10. Inoue S, Watanabe H, Saito H, Hiroi M, Tonosaki A. Elimination of atretic follicles from the mouse ovary: a TEM and immunohistochemical study in mice. *J Anat*. 2000 Jan;196 ( Pt 1):103–110.
11. Tilly JL. Ovarian follicle counts—not as simple as 1, 2, 3. *Reprod Biol Endocrinol*. 2003 Feb;1:11.
12. Kerr JB, Duckett R, Myers M, Britt KL, Mladenovska T, Findlay JK. Quantification of healthy follicles in the neonatal and adult mouse ovary: evidence for maintenance of primordial follicle supply. *Reproduction*. 2006 Jul;132(1):95–109.
13. Malki S, Tharp ME, Bortvin A. A Whole-Mount Approach for Accurate Quantitative and Spatial Assessment of Fetal Oocyte Dynamics in Mice. *Biol Reprod*. 2015 Nov;93(5):113.
14. Faire M, Skillern A, Arora R, Nguyen DH, Wang J, Chamberlain C, et al. Follicle dynamics and global organization in the intact mouse ovary. *Dev Biol*. 2015 Jul;403(1):69–79.

15. Singh JA, Cameron C, Noorbaloochi S, Cullis T, Tucker M, Christensen R, et al. Risk of serious infection in biological treatment of patients with rheumatoid arthritis: a systematic review and meta-analysis. *Lancet*. 2015 Jul;386(9990):258–265.
16. Kirsch F. A systematic review of quality and cost-effectiveness derived from Markov models evaluating smoking cessation interventions in patients with chronic obstructive pulmonary disease. *Expert Rev Pharmacoecon Outcomes Res*. 2015 Apr;15(2):301–316.
17. Lampert A, Korngreen A. Markov modeling of ion channels: implications for understanding disease. *Prog Mol Biol Transl Sci*. 2014;123:1–21.
18. Jit M, Brisson M. Modelling the epidemiology of infectious diseases for decision analysis: a primer. *Pharmacoeconomics*. 2011 May;29(5):371–386.
19. Parker WH, Broder MS, Liu Z, Shoupe D, Farquhar C, Berek JS. Ovarian conservation at the time of hysterectomy for benign disease. *Clin Obstet Gynecol*. 2007 Jun;50(2):354–361.
20. R Development Core Team. R: A Language and Environment for Statistical Computing. Vienna, Austria; 2008. ISBN 3-900051-07-0. Available from: <http://www.R-project.org>.
21. Telfer E, Ansell JD, Taylor H, Gosden RG. The number of clonal precursors of the follicular epithelium in the mouse ovary. *J Reprod Fertil*. 1988 Sep;84(1):105–110.
22. Johnson J, Canning J, Kaneko T, Pru JK, Tilly JL. Germline stem cells and follicular renewal in the postnatal mammalian ovary. *Nature*. 2004 Mar;428(6979):145–150.
23. Selesniemi K, Lee HJ, Tilly JL. Moderate caloric restriction initiated in rodents during adulthood sustains function of the female reproductive axis into advanced chronological age. *Aging Cell*. 2008 Oct;7(5):622–629.
24. Tilly JL. Ovarian follicle counts—not as simple as 1, 2, 3. *Reprod Biol Endocrinol*. 2003 Feb;1:11.



25. Johnson J, Canning J, Kaneko T, Pru JK, Tilly JL. Germline stem cells and follicular renewal in the postnatal mammalian ovary. *Nature*. 2004 Mar;428(6979):145–150.
26. Durlinger AL, Kramer P, Karels B, de Jong FH, Uilenbroek JT, Grootegoed JA, et al. Control of primordial follicle recruitment by anti-Müllerian hormone in the mouse ovary. *Endocrinology*. 1999 Dec;140(12):5789–5796.
27. Moley KH, Schreiber JR. Ovarian follicular growth, ovulation and atresia. Endocrine, paracrine and autocrine regulation. *Adv Exp Med Biol*. 1995;377:103–119.
28. Webb R, Campbell BK. Development of the dominant follicle: mechanisms of selection and maintenance of oocyte quality. *Soc Reprod Fertil Suppl*. 2007;64:141–163.
29. Durlinger AL, Gruijters MJ, Kramer P, Karels B, Kumar TR, Matzuk MM, et al. Anti-Müllerian hormone attenuates the effects of FSH on follicle development in the mouse ovary. *Endocrinology*. 2001 Nov;142(11):4891–4899.
30. Durlinger AL, Gruijters MJ, Kramer P, Karels B, Ingraham HA, Nachtigal MW, et al. Anti-Müllerian hormone inhibits initiation of primordial follicle growth in the mouse ovary. *Endocrinology*. 2002 Mar;143(3):1076–1084.
31. Johnson J, Keefe DL. Ovarian aging: breaking up is hard to fix. *Sci Transl Med*. 2013 Feb;5(172):172fs5.
32. Titus S, Li F, Stobezki R, Akula K, Unsal E, Jeong K, et al. Impairment of BRCA1-related DNA double-strand break repair leads to ovarian aging in mice and humans. *Sci Transl Med*. 2013 Feb;5(172):172ra21.
33. Titus S, Stobezki R, Oktay K. Impaired DNA Repair as a Mechanism for Oocyte Aging: Is It Epigenetically Determined? *Semin Reprod Med*. 2015 Nov;.
34. Sciarra JJ, Keith LG. Multiple pregnancy: an international perspective. *Acta Genet Med Gemellol (Roma)*. 1990;39(3):353–360.

35. Ananth CV, Joseph Ks Ks, Smulian JC. Trends in twin neonatal mortality rates in the United States, 1989 through 1999: influence of birth registration and obstetric intervention. *Am J Obstet Gynecol*. 2004 May;190(5):1313–1321.
36. Uthman OA, Uthman MB, Yahaya I. A population-based study of effect of multiple birth on infant mortality in Nigeria. *BMC Pregnancy Childbirth*. 2008;8:41.
37. Saunders P, Skar P. Archetypes, complexes and self-organization. *J Anal Psychol*. 2001 Apr;46(2):305–323.
38. Cohen IR, Harel D. Explaining a complex living system: dynamics, multi-scaling and emergence. *J R Soc Interface*. 2007 Apr;4(13):175–182.
39. Silber S. Unifying theory of adult resting follicle recruitment and fetal oocyte arrest. *Reprod Biomed Online*. 2015 Oct;31(4):472–475.
40. Zou K, Yuan Z, Yang Z, Luo H, Sun K, Zhou L, et al. Production of offspring from a germline stem cell line derived from neonatal ovaries. *Nat Cell Biol*. 2009 May;11(5):631–636.
41. Pacchiarotti J, Maki C, Ramos T, Marh J, Howerton K, Wong J, et al. Differentiation potential of germ line stem cells derived from the postnatal mouse ovary. *Differentiation*. 2010 Mar;79(3):159–170.
42. Zhang Y, Yang Z, Yang Y, Wang S, Shi L, Xie W, et al. Production of transgenic mice by random recombination of targeted genes in female germline stem cells. *J Mol Cell Biol*. 2011 Apr;3(2):132–141.
43. Zou K, Hou L, Sun K, Xie W, Wu J. Improved efficiency of female germline stem cell purification using fragilis-based magnetic bead sorting. *Stem Cells Dev*. 2011 Dec;20(12):2197–2204.
44. White YA, Woods DC, Takai Y, Ishihara O, Seki H, Tilly JL. Oocyte formation by mitotically active germ cells purified from ovaries of reproductive-age women. *Nat Med*. 2012 Mar;18(3):413–421.

45. Woods DC, Tilly JL. Isolation, characterization and propagation of mitotically active germ cells from adult mouse and human ovaries. *Nat Protoc.* 2013 May;8(5):966–988.
46. Imudia AN, Wang N, Tanaka Y, White YA, Woods DC, Tilly JL. Comparative gene expression profiling of adult mouse ovary-derived oogonial stem cells supports a distinct cellular identity. *Fertil Steril.* 2013 Nov;100(5):1451–1458.
47. Park ES, Woods DC, Tilly JL. Bone morphogenetic protein 4 promotes mammalian oogonial stem cell differentiation via Smad1/5/8 signaling. *Fertil Steril.* 2013 Nov;100(5):1468–1475.
48. Zhou L, Wang L, Kang JX, Xie W, Li X, Wu C, et al. Production of fat-1 transgenic rats using a post-natal female germline stem cell line. *Mol Hum Reprod.* 2014 Mar;20(3):271–281.
49. Xie W, Wang H, Wu J. Similar morphological and molecular signatures shared by female and male germline stem cells. *Sci Rep.* 2014;4:5580.
50. Khosravi-Farsani S, Amidi F, Habibi Roudkenar M, Sobhani A. Isolation and enrichment of mouse female germ line stem cells. *Cell J.* 2015;16(4):406–415.
51. Woods DC, Tilly JL. Autologous Germline Mitochondrial Energy Transfer (AUGMENT) in Human Assisted Reproduction. *Semin Reprod Med.* 2015 Nov;.
52. Oktay K, Baltaci V, Sonmezer M, Turan V, Unsal E, Baltaci A, et al. Oogonial Precursor Cell-Derived Autologous Mitochondria Injection to Improve Outcomes in Women With Multiple IVF Failures Due to Low Oocyte Quality: A Clinical Translation. *Reprod Sci.* 2015 Dec;22(12):1612–1617.
53. Fakhri MH, El Shmouy M, Szeptycki J, de la Cruz D, Lux C, Verjee S, et al. The AUGMENT<sup>SM</sup> Treatment: Physician Reported Outcomes of the Initial Global Patient Experience. *JFIV Reprod Med Genet.* 2015;3:154.

## Figure Legends

### **Figure 1. Markov state transition diagram of mouse ovarian follicle**

**development.** This flow chart shows the simplified logic of follicle development, where two decisions are made using stationary probabilities. From left to right, the first decision for an individual primordial follicle (numerical matrix entry of 1, 2, or 3 granulosa cells) is whether to remain arrested (“Hold”) or to growth activate (“Grow”). Growth activation introduces a daily doubling of cell number. A follicle may then either grow or die daily, with a correction factor of cell death applied to granulosa cell number. If a follicle reaches a threshold number of granulosa cells, it is categorized as an ovulatory follicle.

**Figure 2. Example  $\bar{O}vSim$  mouse ovary output.** Default plots produced after an  $\bar{O}vSim$  run with “puberty” option set to TRUE. X-axes shown represent total simulated time in days; pubertal animals would be approximately 50 days old at the start of the simulation. The trajectory of decline of the primordial follicle pool for 1000  $\bar{O}vSim$  runs is plotted as shown in panel **A** where the gray shaded area is the first and 99th percentiles of run output. Circles are actual data from follicle counts of C57Bl/6 mice at 6 weeks, 8 months, and 12 months of age ( $n = 4$  ovaries, each from a different animal). In **B**, the growth history of individual follicles that die *via* atresia in a single run is shown by plotting the number of granulosa cells (dashed line) over time, ending with follicle death denoted by the letter “D.” **C** shows the number of follicles that survive to ovulatory size cutoff (50,000 granulosa cells) each ovulatory cycle (here, 4 days), and dashed vertical lines mark months of time within a single simulation run.

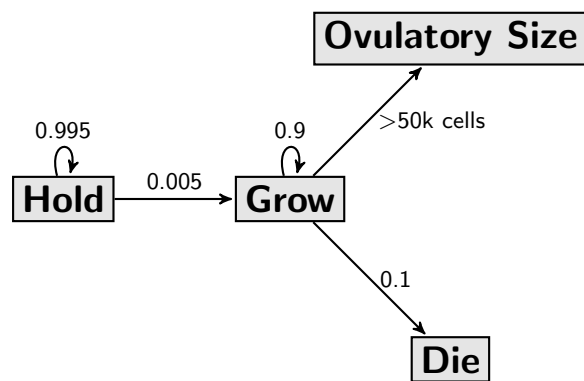

**Figure 1.** Mouse Ovarian Follicle Markov State Transition Diagram.

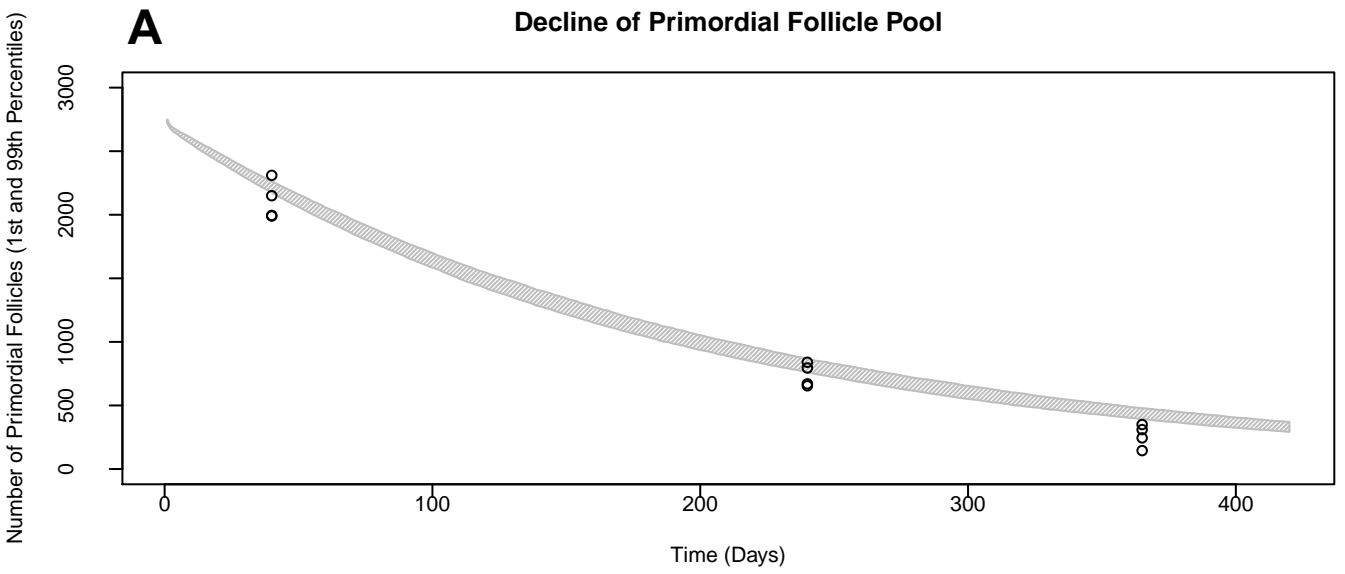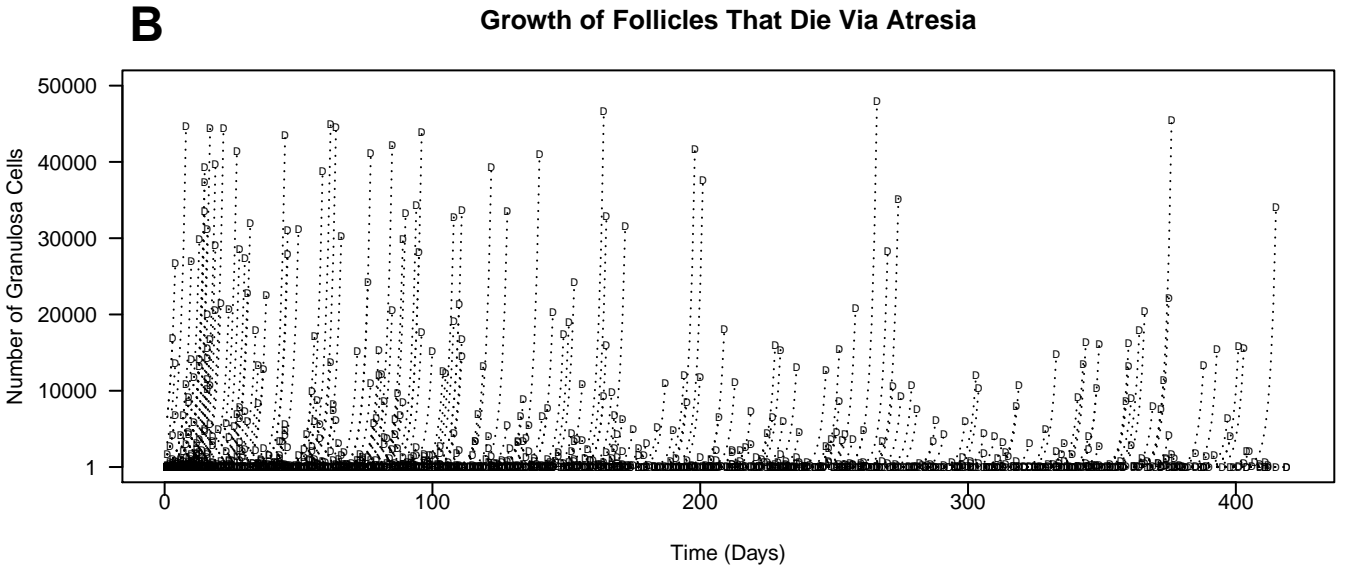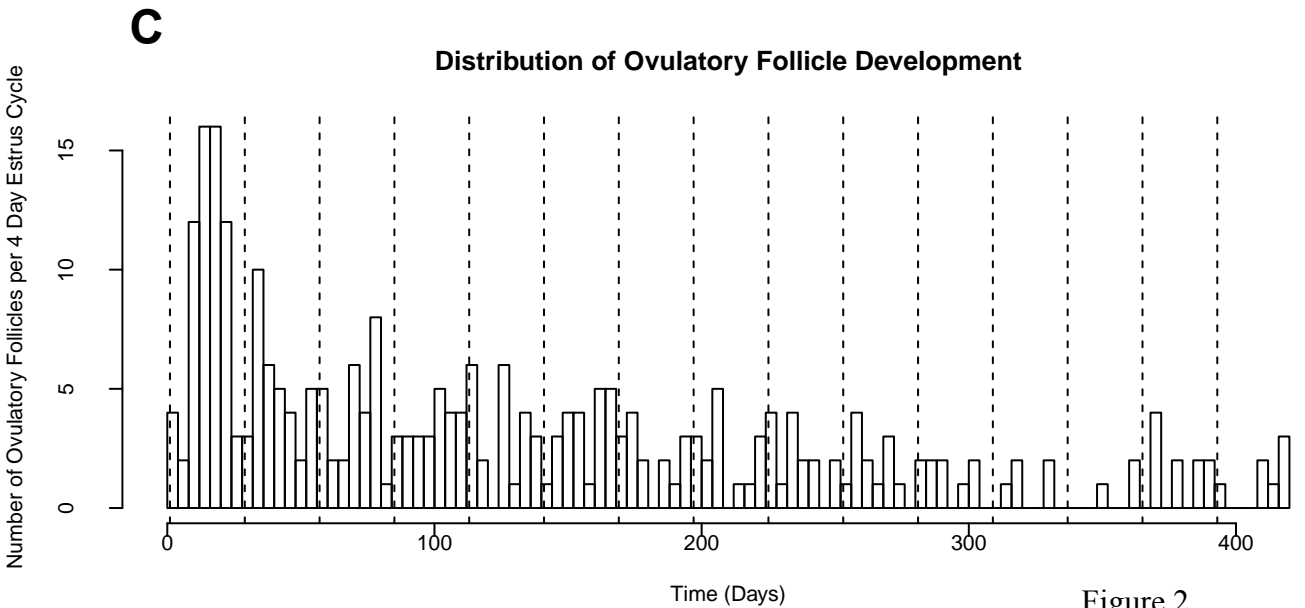

Figure 2.
